# Supplementary material
Source: publisher figshare collection journal article supplement (https://springernature.figshare.com/ndownloader/files/22471568)
Supplement: Supplementary file 1 [file 22471568]

# IGNITE Sustainability II Survey

Please complete the survey below.

Thank you!

---

---

## Respondent information

Institution's Name: \_\_\_\_\_

IGNITE member type: ☐ Funded Site  
☐ Research Affiliate  
☐ Commercial Affiliate  
((Funded Site, Research Affiliate or Commercial Affiliate))

Respondent Name: \_\_\_\_\_

Respondent's role: ☐ PI  
☐ Co-I  
☐ PM  
☐ Other  
((PI, Co-I, PM, etc))

If other, please specify \_\_\_\_\_

Principal Investigator(s) Name: \_\_\_\_\_

Date \_\_\_\_\_  
(Please click "Today" button)

---

---

## Member Site Demographic

**Please check all the boxes that describe your institution**

Institution type

- ☐ University/Academic Medical Center
- ☐ Community Medical Center
- ☐ Commercial Organization

For profit or not for profit?

- ☐ For Profit
- ☐ Not for Profit

Institution Level

- ☐ Federal Institution
- ☐ State/Local
- ☐ Public/Private/Owned

Institution location

- ☐ Rural
- ☐ Urban

Institution size

- ☐ Single Entity
- ☐ System Member
- ☐ Integrated Network

---

**Genomic Testing Information**


---

**Please note: The following section should only be completed for the genomic tests performed for or by the IGNITE member and affiliate laboratory PI's, and should not reflect the overall genomic testing (research or clinical) performed throughout your institution.**

**Please identify all genomic tests being performed by IGNITE member laboratories only and check all that apply from each column. Please leave blank if test is not tested at your institution.**

|                            | Single<br>Gene<br>Testing | Part of a<br>Panel       | Whole<br>Genome or<br>Exome<br>testing | Used in<br>Research      | Reported<br>Clinically   | Used for<br>Diagnosis    | Used to<br>predict<br>Clinical<br>Outcome(s) |
|----------------------------|---------------------------|--------------------------|----------------------------------------|--------------------------|--------------------------|--------------------------|----------------------------------------------|
| CYP2B6                     | <input type="checkbox"/>  | <input type="checkbox"/> | <input type="checkbox"/>               | <input type="checkbox"/> | <input type="checkbox"/> | <input type="checkbox"/> | <input type="checkbox"/>                     |
| CYP2C8                     | <input type="checkbox"/>  | <input type="checkbox"/> | <input type="checkbox"/>               | <input type="checkbox"/> | <input type="checkbox"/> | <input type="checkbox"/> | <input type="checkbox"/>                     |
| CYP2C9                     | <input type="checkbox"/>  | <input type="checkbox"/> | <input type="checkbox"/>               | <input type="checkbox"/> | <input type="checkbox"/> | <input type="checkbox"/> | <input type="checkbox"/>                     |
| CYP2C19                    | <input type="checkbox"/>  | <input type="checkbox"/> | <input type="checkbox"/>               | <input type="checkbox"/> | <input type="checkbox"/> | <input type="checkbox"/> | <input type="checkbox"/>                     |
| CYP2C cluster (rs12777823) | <input type="checkbox"/>  | <input type="checkbox"/> | <input type="checkbox"/>               | <input type="checkbox"/> | <input type="checkbox"/> | <input type="checkbox"/> | <input type="checkbox"/>                     |
| CYP2D6                     | <input type="checkbox"/>  | <input type="checkbox"/> | <input type="checkbox"/>               | <input type="checkbox"/> | <input type="checkbox"/> | <input type="checkbox"/> | <input type="checkbox"/>                     |
| CYP3A4                     | <input type="checkbox"/>  | <input type="checkbox"/> | <input type="checkbox"/>               | <input type="checkbox"/> | <input type="checkbox"/> | <input type="checkbox"/> | <input type="checkbox"/>                     |
| CYP3A5                     | <input type="checkbox"/>  | <input type="checkbox"/> | <input type="checkbox"/>               | <input type="checkbox"/> | <input type="checkbox"/> | <input type="checkbox"/> | <input type="checkbox"/>                     |
| CYP4F2                     | <input type="checkbox"/>  | <input type="checkbox"/> | <input type="checkbox"/>               | <input type="checkbox"/> | <input type="checkbox"/> | <input type="checkbox"/> | <input type="checkbox"/>                     |
| NUDT15                     | <input type="checkbox"/>  | <input type="checkbox"/> | <input type="checkbox"/>               | <input type="checkbox"/> | <input type="checkbox"/> | <input type="checkbox"/> | <input type="checkbox"/>                     |
| SLCO1B1                    | <input type="checkbox"/>  | <input type="checkbox"/> | <input type="checkbox"/>               | <input type="checkbox"/> | <input type="checkbox"/> | <input type="checkbox"/> | <input type="checkbox"/>                     |
| TPMT                       | <input type="checkbox"/>  | <input type="checkbox"/> | <input type="checkbox"/>               | <input type="checkbox"/> | <input type="checkbox"/> | <input type="checkbox"/> | <input type="checkbox"/>                     |
| VKORC1                     | <input type="checkbox"/>  | <input type="checkbox"/> | <input type="checkbox"/>               | <input type="checkbox"/> | <input type="checkbox"/> | <input type="checkbox"/> | <input type="checkbox"/>                     |
| ABCB1                      | <input type="checkbox"/>  | <input type="checkbox"/> | <input type="checkbox"/>               | <input type="checkbox"/> | <input type="checkbox"/> | <input type="checkbox"/> | <input type="checkbox"/>                     |
| ABCC2                      | <input type="checkbox"/>  | <input type="checkbox"/> | <input type="checkbox"/>               | <input type="checkbox"/> | <input type="checkbox"/> | <input type="checkbox"/> | <input type="checkbox"/>                     |
| ABCC3                      | <input type="checkbox"/>  | <input type="checkbox"/> | <input type="checkbox"/>               | <input type="checkbox"/> | <input type="checkbox"/> | <input type="checkbox"/> | <input type="checkbox"/>                     |
| ABCC4                      | <input type="checkbox"/>  | <input type="checkbox"/> | <input type="checkbox"/>               | <input type="checkbox"/> | <input type="checkbox"/> | <input type="checkbox"/> | <input type="checkbox"/>                     |
| DPYD                       | <input type="checkbox"/>  | <input type="checkbox"/> | <input type="checkbox"/>               | <input type="checkbox"/> | <input type="checkbox"/> | <input type="checkbox"/> | <input type="checkbox"/>                     |
| DRD1                       | <input type="checkbox"/>  | <input type="checkbox"/> | <input type="checkbox"/>               | <input type="checkbox"/> | <input type="checkbox"/> | <input type="checkbox"/> | <input type="checkbox"/>                     |
| DRD2                       | <input type="checkbox"/>  | <input type="checkbox"/> | <input type="checkbox"/>               | <input type="checkbox"/> | <input type="checkbox"/> | <input type="checkbox"/> | <input type="checkbox"/>                     |
| G6PD                       | <input type="checkbox"/>  | <input type="checkbox"/> | <input type="checkbox"/>               | <input type="checkbox"/> | <input type="checkbox"/> | <input type="checkbox"/> | <input type="checkbox"/>                     |
| FAAH                       | <input type="checkbox"/>  | <input type="checkbox"/> | <input type="checkbox"/>               | <input type="checkbox"/> | <input type="checkbox"/> | <input type="checkbox"/> | <input type="checkbox"/>                     |
| GRIN2A                     | <input type="checkbox"/>  | <input type="checkbox"/> | <input type="checkbox"/>               | <input type="checkbox"/> | <input type="checkbox"/> | <input type="checkbox"/> | <input type="checkbox"/>                     |
| HLA-A*31:01                | <input type="checkbox"/>  | <input type="checkbox"/> | <input type="checkbox"/>               | <input type="checkbox"/> | <input type="checkbox"/> | <input type="checkbox"/> | <input type="checkbox"/>                     |
| HLA-B*15:02                | <input type="checkbox"/>  | <input type="checkbox"/> | <input type="checkbox"/>               | <input type="checkbox"/> | <input type="checkbox"/> | <input type="checkbox"/> | <input type="checkbox"/>                     |
| HLA-B*57:01                | <input type="checkbox"/>  | <input type="checkbox"/> | <input type="checkbox"/>               | <input type="checkbox"/> | <input type="checkbox"/> | <input type="checkbox"/> | <input type="checkbox"/>                     |

|             |                          |                          |                          |                          |                          |                          |                          |
|-------------|--------------------------|--------------------------|--------------------------|--------------------------|--------------------------|--------------------------|--------------------------|
| HLA-B*58:01 | <input type="checkbox"/> |
| HTR2A       | <input type="checkbox"/> |
| HTR2C       | <input type="checkbox"/> |
| IFNL3       | <input type="checkbox"/> |
| ITPA        | <input type="checkbox"/> |
| MTHFR       | <input type="checkbox"/> |
| OCT1        | <input type="checkbox"/> |
| OPRM1       | <input type="checkbox"/> |
| SLC6A4      | <input type="checkbox"/> |
| SV2C        | <input type="checkbox"/> |
| UGT1A1      | <input type="checkbox"/> |
| UGT1A9      | <input type="checkbox"/> |
| UGT2B7      | <input type="checkbox"/> |
| UGT2B15     | <input type="checkbox"/> |

## Reimbursement Information

**Please note: The following section should only be completed for the genomic tests identified above as being reported clinically by your PI and should not reflect the overall genomic testing reported clinically throughout the institution.**

**Check all that apply**

|                            | Performed<br>Inpatient   | Performed<br>Outpatient  | Billing<br>Patients<br>Directly | Billing 3rd<br>Party Payers | Other<br>coverage<br>(Institutional<br>or pilot<br>funding) | N/A                      |
|----------------------------|--------------------------|--------------------------|---------------------------------|-----------------------------|-------------------------------------------------------------|--------------------------|
| CYP2B6                     | <input type="checkbox"/> | <input type="checkbox"/> | <input type="checkbox"/>        | <input type="checkbox"/>    | <input type="checkbox"/>                                    | <input type="checkbox"/> |
| CYP2C8                     | <input type="checkbox"/> | <input type="checkbox"/> | <input type="checkbox"/>        | <input type="checkbox"/>    | <input type="checkbox"/>                                    | <input type="checkbox"/> |
| CYP2C9                     | <input type="checkbox"/> | <input type="checkbox"/> | <input type="checkbox"/>        | <input type="checkbox"/>    | <input type="checkbox"/>                                    | <input type="checkbox"/> |
| CYP2C19                    | <input type="checkbox"/> | <input type="checkbox"/> | <input type="checkbox"/>        | <input type="checkbox"/>    | <input type="checkbox"/>                                    | <input type="checkbox"/> |
| CYP2C cluster (rs12777823) | <input type="checkbox"/> | <input type="checkbox"/> | <input type="checkbox"/>        | <input type="checkbox"/>    | <input type="checkbox"/>                                    | <input type="checkbox"/> |
| CYP2D6                     | <input type="checkbox"/> | <input type="checkbox"/> | <input type="checkbox"/>        | <input type="checkbox"/>    | <input type="checkbox"/>                                    | <input type="checkbox"/> |
| CYP3A4                     | <input type="checkbox"/> | <input type="checkbox"/> | <input type="checkbox"/>        | <input type="checkbox"/>    | <input type="checkbox"/>                                    | <input type="checkbox"/> |
| CYP3A5                     | <input type="checkbox"/> | <input type="checkbox"/> | <input type="checkbox"/>        | <input type="checkbox"/>    | <input type="checkbox"/>                                    | <input type="checkbox"/> |
| CYP4F2                     | <input type="checkbox"/> | <input type="checkbox"/> | <input type="checkbox"/>        | <input type="checkbox"/>    | <input type="checkbox"/>                                    | <input type="checkbox"/> |
| NUDT15                     | <input type="checkbox"/> | <input type="checkbox"/> | <input type="checkbox"/>        | <input type="checkbox"/>    | <input type="checkbox"/>                                    | <input type="checkbox"/> |
| SLCO1B1                    | <input type="checkbox"/> | <input type="checkbox"/> | <input type="checkbox"/>        | <input type="checkbox"/>    | <input type="checkbox"/>                                    | <input type="checkbox"/> |
| TPMT                       | <input type="checkbox"/> | <input type="checkbox"/> | <input type="checkbox"/>        | <input type="checkbox"/>    | <input type="checkbox"/>                                    | <input type="checkbox"/> |
| VKORC1                     | <input type="checkbox"/> | <input type="checkbox"/> | <input type="checkbox"/>        | <input type="checkbox"/>    | <input type="checkbox"/>                                    | <input type="checkbox"/> |
| ABCB1                      | <input type="checkbox"/> | <input type="checkbox"/> | <input type="checkbox"/>        | <input type="checkbox"/>    | <input type="checkbox"/>                                    | <input type="checkbox"/> |
| ABCC2                      | <input type="checkbox"/> | <input type="checkbox"/> | <input type="checkbox"/>        | <input type="checkbox"/>    | <input type="checkbox"/>                                    | <input type="checkbox"/> |
| ABCC3                      | <input type="checkbox"/> | <input type="checkbox"/> | <input type="checkbox"/>        | <input type="checkbox"/>    | <input type="checkbox"/>                                    | <input type="checkbox"/> |
| ABCC4                      | <input type="checkbox"/> | <input type="checkbox"/> | <input type="checkbox"/>        | <input type="checkbox"/>    | <input type="checkbox"/>                                    | <input type="checkbox"/> |
| DPYD                       | <input type="checkbox"/> | <input type="checkbox"/> | <input type="checkbox"/>        | <input type="checkbox"/>    | <input type="checkbox"/>                                    | <input type="checkbox"/> |
| DRD1                       | <input type="checkbox"/> | <input type="checkbox"/> | <input type="checkbox"/>        | <input type="checkbox"/>    | <input type="checkbox"/>                                    | <input type="checkbox"/> |
| DRD2                       | <input type="checkbox"/> | <input type="checkbox"/> | <input type="checkbox"/>        | <input type="checkbox"/>    | <input type="checkbox"/>                                    | <input type="checkbox"/> |
| FAAH                       | <input type="checkbox"/> | <input type="checkbox"/> | <input type="checkbox"/>        | <input type="checkbox"/>    | <input type="checkbox"/>                                    | <input type="checkbox"/> |
| G6PD                       | <input type="checkbox"/> | <input type="checkbox"/> | <input type="checkbox"/>        | <input type="checkbox"/>    | <input type="checkbox"/>                                    | <input type="checkbox"/> |
| GRIN2A                     | <input type="checkbox"/> | <input type="checkbox"/> | <input type="checkbox"/>        | <input type="checkbox"/>    | <input type="checkbox"/>                                    | <input type="checkbox"/> |
| IFNL3                      | <input type="checkbox"/> | <input type="checkbox"/> | <input type="checkbox"/>        | <input type="checkbox"/>    | <input type="checkbox"/>                                    | <input type="checkbox"/> |
| HLA-A*31:01                | <input type="checkbox"/> | <input type="checkbox"/> | <input type="checkbox"/>        | <input type="checkbox"/>    | <input type="checkbox"/>                                    | <input type="checkbox"/> |
| HLA-B*15:02                | <input type="checkbox"/> | <input type="checkbox"/> | <input type="checkbox"/>        | <input type="checkbox"/>    | <input type="checkbox"/>                                    | <input type="checkbox"/> |
| HLA-B*57:01                | <input type="checkbox"/> | <input type="checkbox"/> | <input type="checkbox"/>        | <input type="checkbox"/>    | <input type="checkbox"/>                                    | <input type="checkbox"/> |

|             |                          |                          |                          |                          |                          |                          |
|-------------|--------------------------|--------------------------|--------------------------|--------------------------|--------------------------|--------------------------|
| HLA-B*58:01 | <input type="checkbox"/> |
| HTR2A       | <input type="checkbox"/> |
| HTR2C       | <input type="checkbox"/> |
| ITPA        | <input type="checkbox"/> |
| MTHFR       | <input type="checkbox"/> |
| OCT1        | <input type="checkbox"/> |
| OPRM1       | <input type="checkbox"/> |
| SLC6A4      | <input type="checkbox"/> |
| SV2C        | <input type="checkbox"/> |
| UGT1A1      | <input type="checkbox"/> |
| UGT1A9      | <input type="checkbox"/> |
| UGT2B7      | <input type="checkbox"/> |
| UGT2B15     | <input type="checkbox"/> |

If "billing 3rd party payers" was selected, please list specific indications and test(s) associated with receiving reimbursement.

(For example: "Depression (CYP2C19 and CYP2D6)")

If "Other Coverage" was selected, please indicate the source of funding.

(For example: pilot or research funding)

---

**Fiscal Information**

---

For those tests that you are reporting clinical results and making therapeutic change recommendations to providers, are they performed in your own CLIA laboratory?

- ☐ Yes  
☐ No  
("Own lab" = PI-controlled lab. Not institution/Reference lab.)

If No, are the tests performed at your institution's CLIA laboratory?

- ☐ Yes  
☐ No

If No, are tests sent out to a Reference Laboratory?

- ☐ Yes  
☐ No  
(External or commercial laboratory)

Before implementing genomic testing clinically, did your institution perform a financial analysis to confirm sustainability?

- ☐ Yes  
☐ No

If no, why not?

---

**For tests listed previously and not currently adopted for clinical use (providers are not notified with recommendation for therapy change), please check all of the appropriate boxes on why the tests are not being reported clinically:**

|                            | Insufficient<br>clinical data to<br>support offering<br>test clinically | In the process of<br>converting to<br>clinical use | Financial<br>analysis to be<br>completed | Financial<br>analysis does not<br>support offering<br>test clinically | Other reasons            |
|----------------------------|-------------------------------------------------------------------------|----------------------------------------------------|------------------------------------------|-----------------------------------------------------------------------|--------------------------|
| CYP2B6                     | <input type="checkbox"/>                                                | <input type="checkbox"/>                           | <input type="checkbox"/>                 | <input type="checkbox"/>                                              | <input type="checkbox"/> |
| CYP2C8                     | <input type="checkbox"/>                                                | <input type="checkbox"/>                           | <input type="checkbox"/>                 | <input type="checkbox"/>                                              | <input type="checkbox"/> |
| CYP2C9                     | <input type="checkbox"/>                                                | <input type="checkbox"/>                           | <input type="checkbox"/>                 | <input type="checkbox"/>                                              | <input type="checkbox"/> |
| CYP2C19                    | <input type="checkbox"/>                                                | <input type="checkbox"/>                           | <input type="checkbox"/>                 | <input type="checkbox"/>                                              | <input type="checkbox"/> |
| CYP2C cluster (rs12777823) | <input type="checkbox"/>                                                | <input type="checkbox"/>                           | <input type="checkbox"/>                 | <input type="checkbox"/>                                              | <input type="checkbox"/> |
| CYP2D6                     | <input type="checkbox"/>                                                | <input type="checkbox"/>                           | <input type="checkbox"/>                 | <input type="checkbox"/>                                              | <input type="checkbox"/> |
| CYP3A4                     | <input type="checkbox"/>                                                | <input type="checkbox"/>                           | <input type="checkbox"/>                 | <input type="checkbox"/>                                              | <input type="checkbox"/> |
| CYP3A5                     | <input type="checkbox"/>                                                | <input type="checkbox"/>                           | <input type="checkbox"/>                 | <input type="checkbox"/>                                              | <input type="checkbox"/> |
| CYP4F2                     | <input type="checkbox"/>                                                | <input type="checkbox"/>                           | <input type="checkbox"/>                 | <input type="checkbox"/>                                              | <input type="checkbox"/> |
| NUDT15                     | <input type="checkbox"/>                                                | <input type="checkbox"/>                           | <input type="checkbox"/>                 | <input type="checkbox"/>                                              | <input type="checkbox"/> |
| SLCO1B1                    | <input type="checkbox"/>                                                | <input type="checkbox"/>                           | <input type="checkbox"/>                 | <input type="checkbox"/>                                              | <input type="checkbox"/> |
| TPMT                       | <input type="checkbox"/>                                                | <input type="checkbox"/>                           | <input type="checkbox"/>                 | <input type="checkbox"/>                                              | <input type="checkbox"/> |
| VKORC1                     | <input type="checkbox"/>                                                | <input type="checkbox"/>                           | <input type="checkbox"/>                 | <input type="checkbox"/>                                              | <input type="checkbox"/> |
| ABCB1                      | <input type="checkbox"/>                                                | <input type="checkbox"/>                           | <input type="checkbox"/>                 | <input type="checkbox"/>                                              | <input type="checkbox"/> |
| ABCC2                      | <input type="checkbox"/>                                                | <input type="checkbox"/>                           | <input type="checkbox"/>                 | <input type="checkbox"/>                                              | <input type="checkbox"/> |
| ABCC3                      | <input type="checkbox"/>                                                | <input type="checkbox"/>                           | <input type="checkbox"/>                 | <input type="checkbox"/>                                              | <input type="checkbox"/> |
| ABCC4                      | <input type="checkbox"/>                                                | <input type="checkbox"/>                           | <input type="checkbox"/>                 | <input type="checkbox"/>                                              | <input type="checkbox"/> |
| DPYD                       | <input type="checkbox"/>                                                | <input type="checkbox"/>                           | <input type="checkbox"/>                 | <input type="checkbox"/>                                              | <input type="checkbox"/> |
| DRD1                       | <input type="checkbox"/>                                                | <input type="checkbox"/>                           | <input type="checkbox"/>                 | <input type="checkbox"/>                                              | <input type="checkbox"/> |
| DRD2                       | <input type="checkbox"/>                                                | <input type="checkbox"/>                           | <input type="checkbox"/>                 | <input type="checkbox"/>                                              | <input type="checkbox"/> |
| FAAH                       | <input type="checkbox"/>                                                | <input type="checkbox"/>                           | <input type="checkbox"/>                 | <input type="checkbox"/>                                              | <input type="checkbox"/> |
| G6PD                       | <input type="checkbox"/>                                                | <input type="checkbox"/>                           | <input type="checkbox"/>                 | <input type="checkbox"/>                                              | <input type="checkbox"/> |
| GRIN2A                     | <input type="checkbox"/>                                                | <input type="checkbox"/>                           | <input type="checkbox"/>                 | <input type="checkbox"/>                                              | <input type="checkbox"/> |
| HLA-A*31:01                | <input type="checkbox"/>                                                | <input type="checkbox"/>                           | <input type="checkbox"/>                 | <input type="checkbox"/>                                              | <input type="checkbox"/> |
| HLA-B*15:02                | <input type="checkbox"/>                                                | <input type="checkbox"/>                           | <input type="checkbox"/>                 | <input type="checkbox"/>                                              | <input type="checkbox"/> |
| HLA-B*57:01                | <input type="checkbox"/>                                                | <input type="checkbox"/>                           | <input type="checkbox"/>                 | <input type="checkbox"/>                                              | <input type="checkbox"/> |
| HLA-B*58:01                | <input type="checkbox"/>                                                | <input type="checkbox"/>                           | <input type="checkbox"/>                 | <input type="checkbox"/>                                              | <input type="checkbox"/> |
| HTR2A                      | <input type="checkbox"/>                                                | <input type="checkbox"/>                           | <input type="checkbox"/>                 | <input type="checkbox"/>                                              | <input type="checkbox"/> |
| HTR2C                      | <input type="checkbox"/>                                                | <input type="checkbox"/>                           | <input type="checkbox"/>                 | <input type="checkbox"/>                                              | <input type="checkbox"/> |
| IFNL3                      | <input type="checkbox"/>                                                | <input type="checkbox"/>                           | <input type="checkbox"/>                 | <input type="checkbox"/>                                              | <input type="checkbox"/> |
| ITPA                       | <input type="checkbox"/>                                                | <input type="checkbox"/>                           | <input type="checkbox"/>                 | <input type="checkbox"/>                                              | <input type="checkbox"/> |



|         |                          |                          |                          |                          |                          |
|---------|--------------------------|--------------------------|--------------------------|--------------------------|--------------------------|
| MTHFR   | <input type="checkbox"/> |
| OCT1    | <input type="checkbox"/> |
| OPRM1   | <input type="checkbox"/> |
| SLC6A4  | <input type="checkbox"/> |
| SV2C    | <input type="checkbox"/> |
| UGT1A1  | <input type="checkbox"/> |
| UGT1A9  | <input type="checkbox"/> |
| UGT2B7  | <input type="checkbox"/> |
| UGT2B15 | <input type="checkbox"/> |

If you checked Other Reasons in previous question,  
please identify the reason:

\_\_\_\_\_  
(Name the specific genomic test in your response)

Other than clinical evidence and/or financial  
justification, what else was required to bring your  
research genomic test(s) into clinical practice?

\_\_\_\_\_

---

---

**Thank you for completing the IGNITE Sustainability Survey**

Additional comments

---
